# Supplementary material for: Listeria-based immunotherapy directed against CD105 exerts anti-angiogenic and anti-tumor efficacy in renal cell carcinoma
Source: PubMed Central journal article supplement (PMC9692019; doi:10.3389/fimmu.2022.1038807), 2022-11-11
Supplement: DataSheet_1.pdf [file DataSheet_1.pdf]

## Supplementary Figures

### Supplementary Figure S1

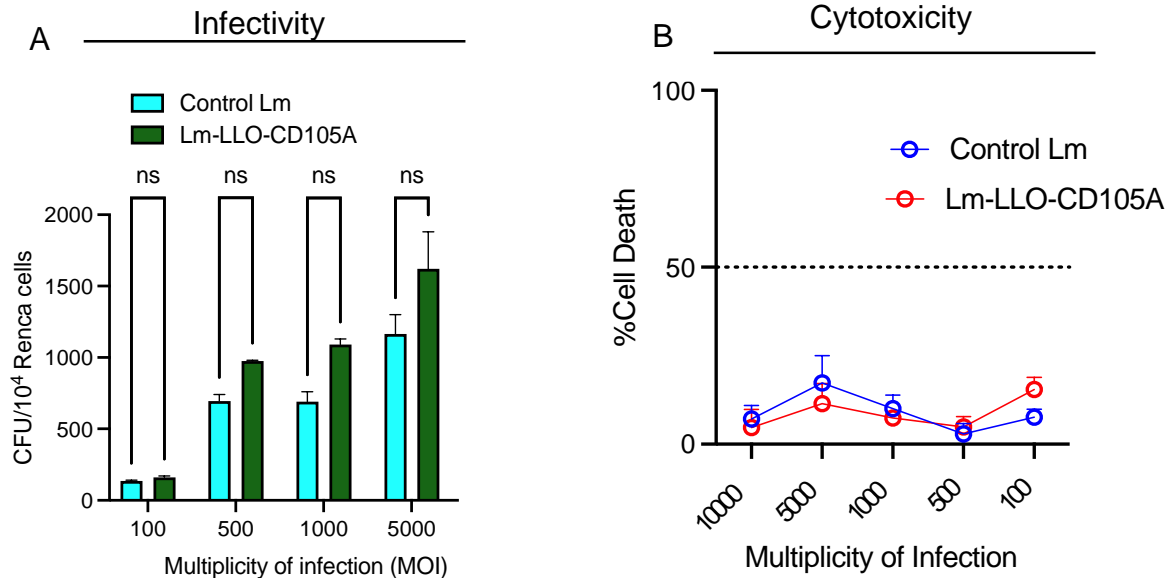

**Supplementary Figure S1. Lm-based vaccine does not induce direct tumor cell killing.** Renca cells were cultured with varying MOIs of Control Lm or Lm-LLO-CD105A, and infection or cytotoxicity was determined (**A**) Infectivity rate, expressed as CFU/10,000 cells in Renca (**B**) Dose-response curve to Lm-based vaccines in Renca cells

## Supplementary Figure S2

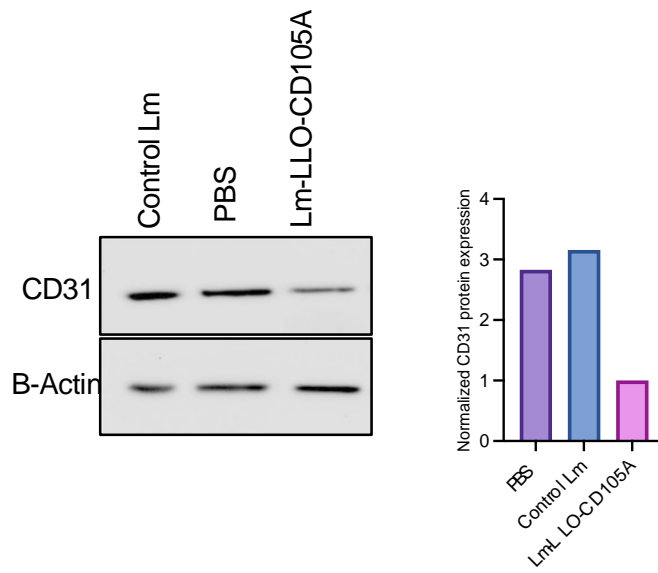

**Supplementary Figure S2.** Protein expression of CD31, a marker of angiogenesis after therapy with Lm-based vaccines.

## Supplementary Figure S3

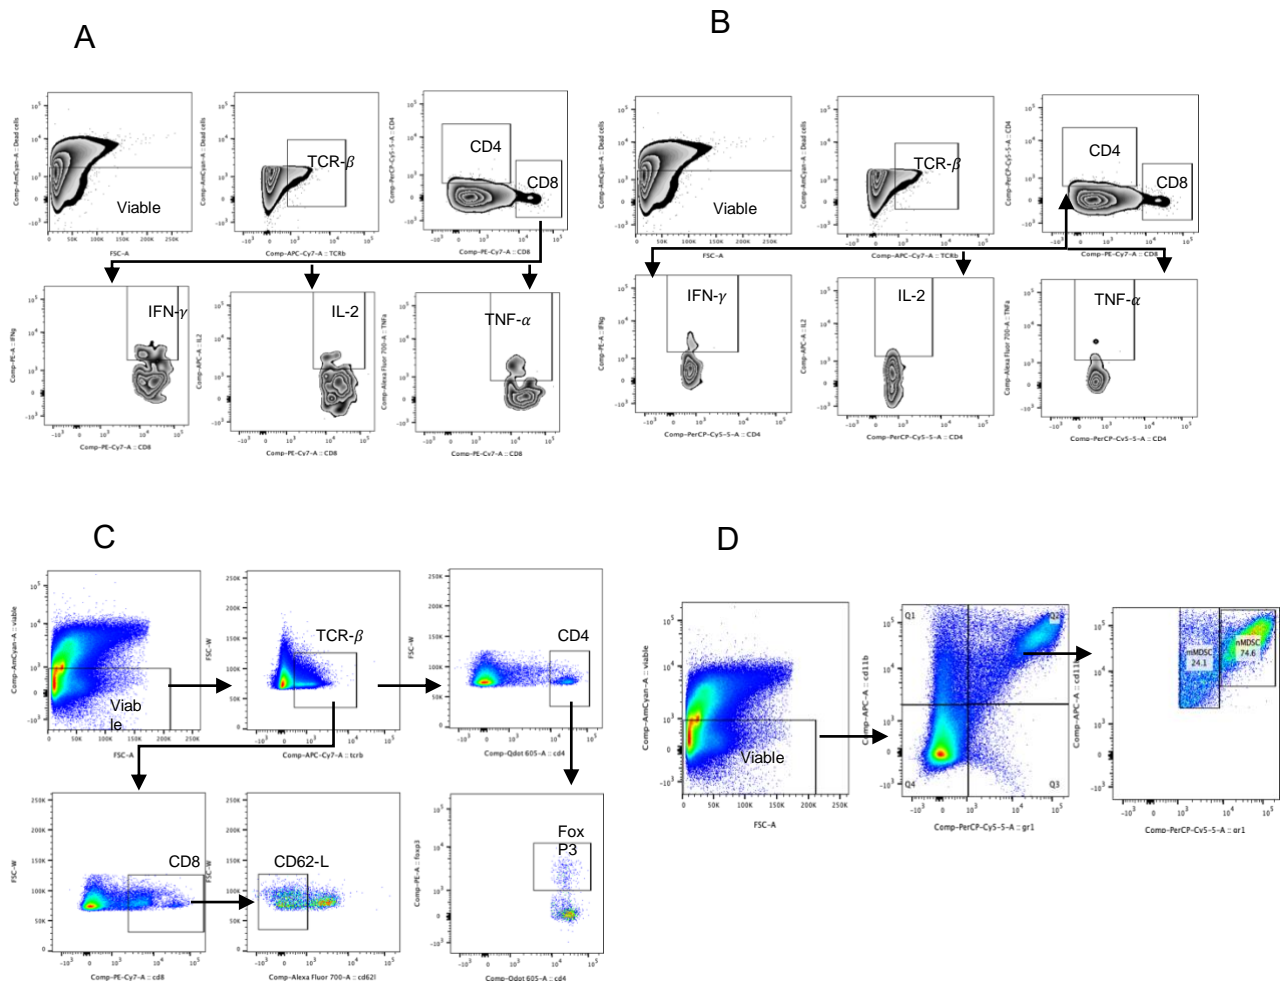

**Supplementary Figure S3. Gating strategy for tumor-infiltrating lymphocytes and myeloid cells.** (A-D) Following stimulation and staining, viable cells were discriminated with Amcyan gating followed by sub-gating with TCR-b. TCR-b<sup>+</sup> cells were further sub-gated to CD4 and CD8<sup>+</sup> T cells. (A) IFN $\gamma$ , IL2, and TNF-a were then sub-gated on CD8<sup>+</sup> T cells or (B) CD4<sup>+</sup> T cells. The combination/Boolean gating function on Flowjo software was used to identify the multicytokine-producing population (C) Dead cells were excluded using Amcyan staining followed by TCR-b selection, CD4 and CD8<sup>+</sup> T cells were then gated on TCRb<sup>+</sup> cells. On CD8<sup>+</sup> cells, the population of CD62L<sup>lo</sup> cells was gated, and on CD4<sup>+</sup> cells population of Foxp3<sup>+</sup> cells were gated (D) Viable cells were discriminated with Amcyan staining, followed by double gating against CD11b and Gr1 to select CD11b<sup>+</sup>Gr1<sup>+</sup> cells. CD11b<sup>+</sup>Gr1<sup>+</sup> cells were further sub gated to characterize CD11b<sup>hi</sup>Gr1<sup>hi</sup> and CD11b<sup>hi</sup>Gr1<sup>lo</sup> cells

Supplementary Figure S4

Subcutaneous tumor

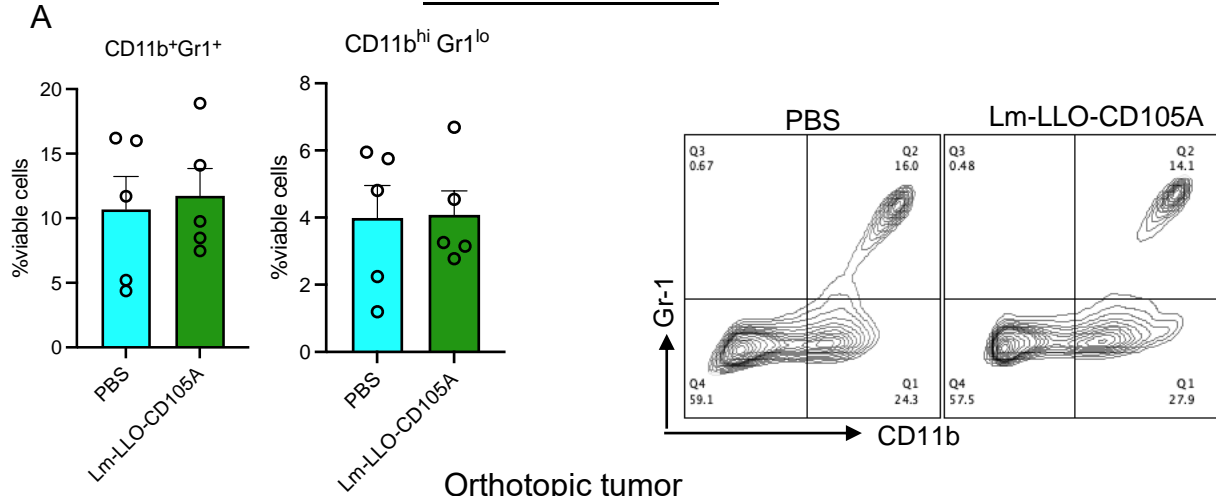

Orthotopic tumor

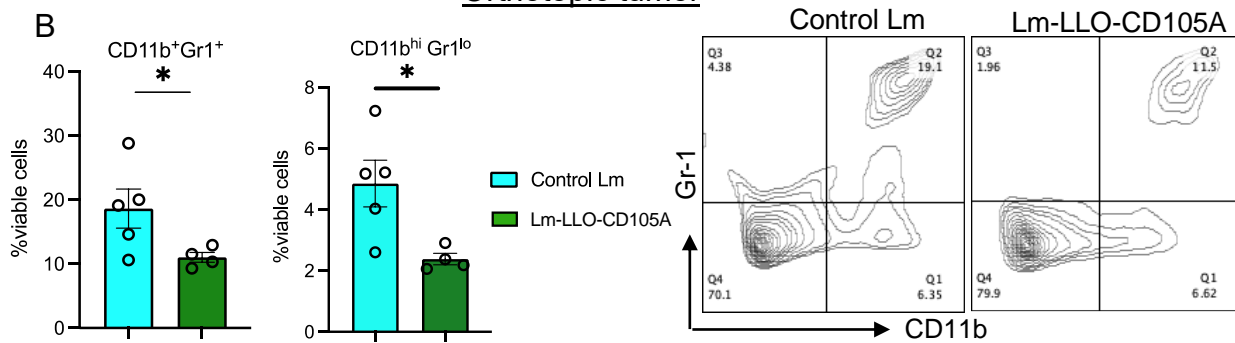

Orthotopic Tumor

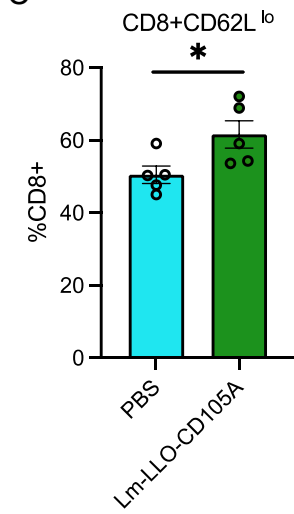

**D**

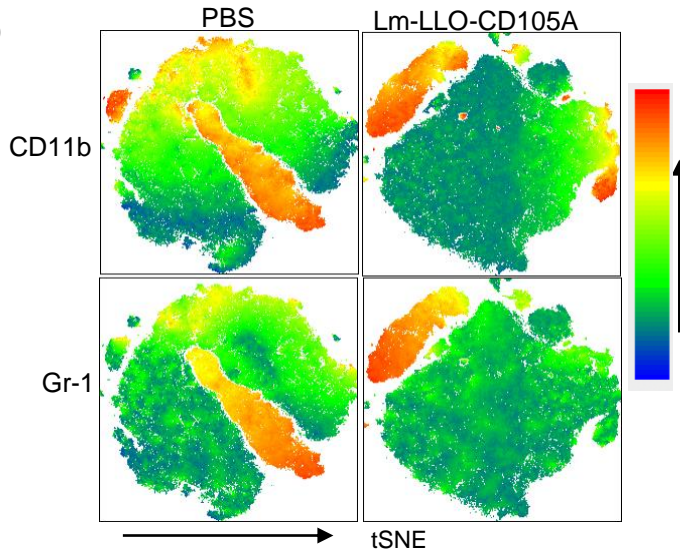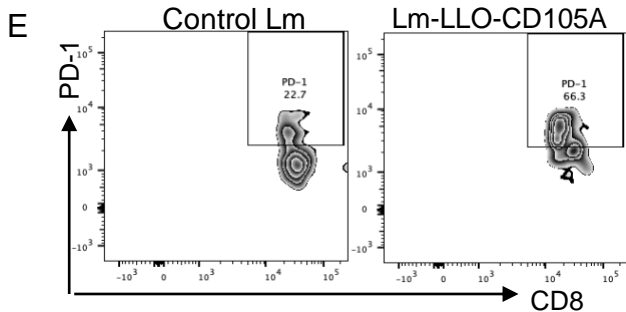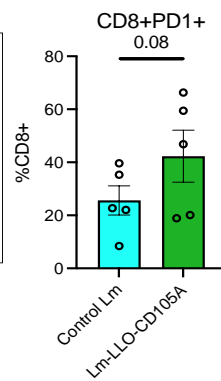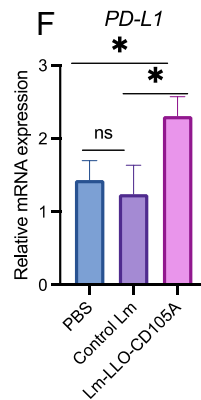

**Supplementary Figure S4. Lm-LLO-CD105A reduces MDSCs and moderately increases PD-1/PD-L1 expression** (A) MDSC population in the subcutaneous tumor between treatment groups. (B) MDSC population in the orthotopic tumor between treatment groups. (C) CD8<sup>+</sup>CD62L<sup>lo</sup> effector CD8<sup>+</sup>T cell population between placebo and Lm-LLO-CD105A treatment groups in the orthotopic model (D) tSNE plot of CD11b<sup>+</sup> and Gr-1<sup>+</sup> cells (E) PD-1 expression by flow cytometry and (F) *Pd-11* mRNA expression by tumors from Control Lm and Lm-LLO-CD105A treatment groups (n=5/group). Data were analyzed using unpaired t-test. \*P < 0.05. All error bars are shown as mean ± SEM.

Supplementary Figure S5

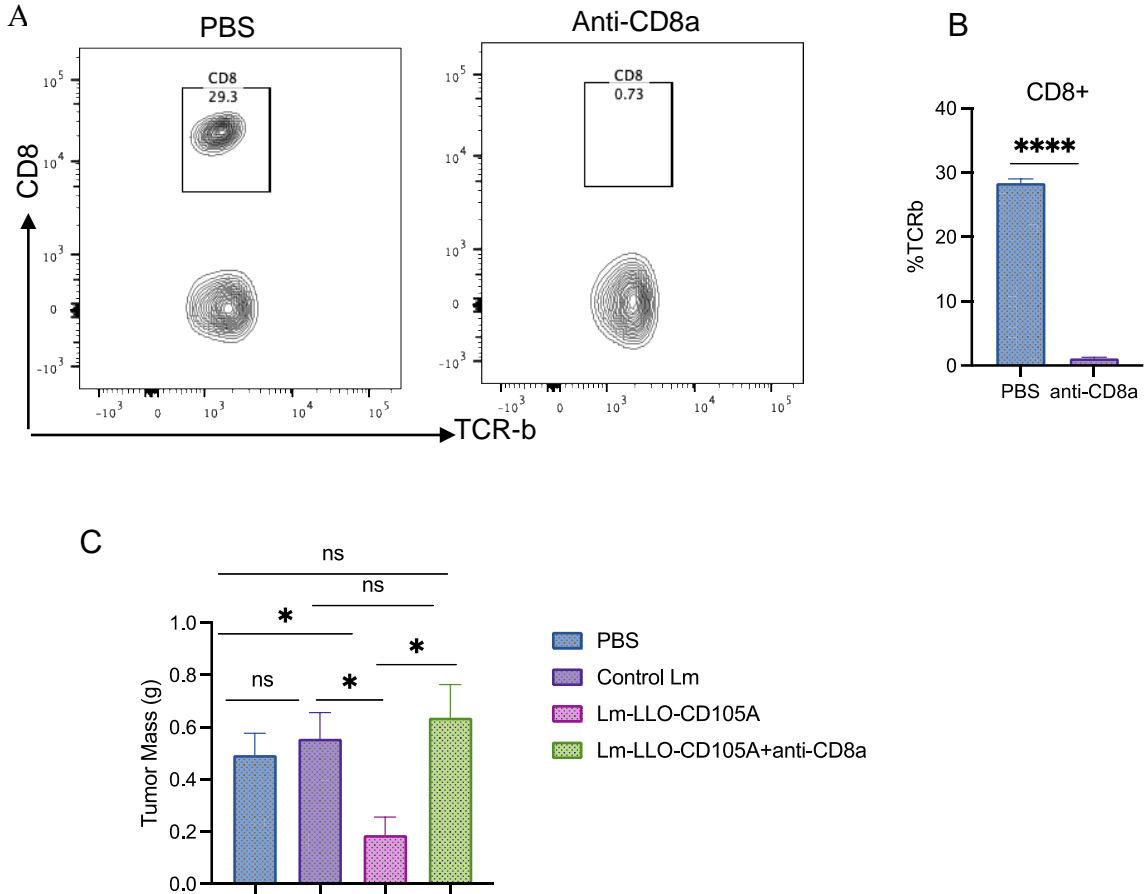

**Supplementary Figure S5. Confirmation of CD8<sup>+</sup> T cell depletion.** (A) Representative plots showing confirmation of CD8 T cell depletion. (B) Statistical representation of CD8<sup>+</sup> population in the spleen (n=3/group). (C) Final tumor mass after CD8 depletion experiments. (n=4-5/group) Data were analyzed using unpaired t-test. \*P < 0.05, \*\*\*\*P < 0.0001 ns, not significant. All error bars are shown as mean  $\pm$  SEM.

Supplementary Figure S6

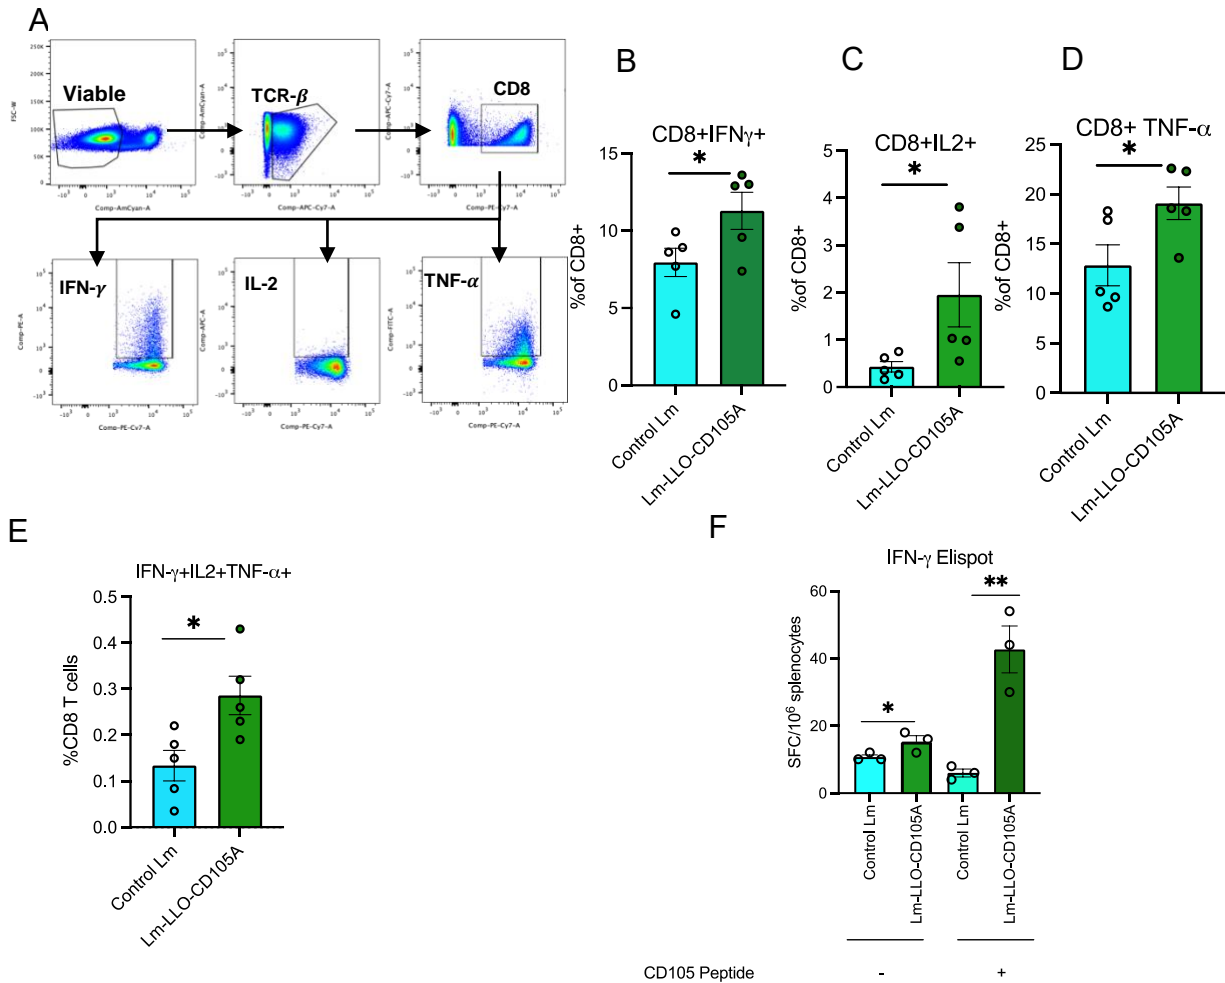

**Supplementary Figure S6. Lm-LLO-CD105A increased the polyfunctionality of antigen-specific CD8<sup>+</sup> T cells in the spleens.** (A) gating strategy for CD8<sup>+</sup> T cells, and cytokine production. Production of (B) IFN $\gamma$  (C) IL-2 and (D) TNF- $\alpha$  by the splenic CD8<sup>+</sup> T cells after treatment with Lm-LLO-CD105A or Control Lm. (E) IFN $\gamma$ <sup>+</sup>IL2<sup>+</sup>TNF $\alpha$ <sup>+</sup> CD8<sup>+</sup> T cell population in the Lm-LLO-CD105A and Control Lm treatment groups (n=5/group). (F) IFN- $\gamma$  Spot forming cells between Control Lm and Lm-LLO-CD105. \*P < 0.05 \*\*P < 0.01 All error bars are shown as mean  $\pm$  SEM.

Supplementary Figure S7

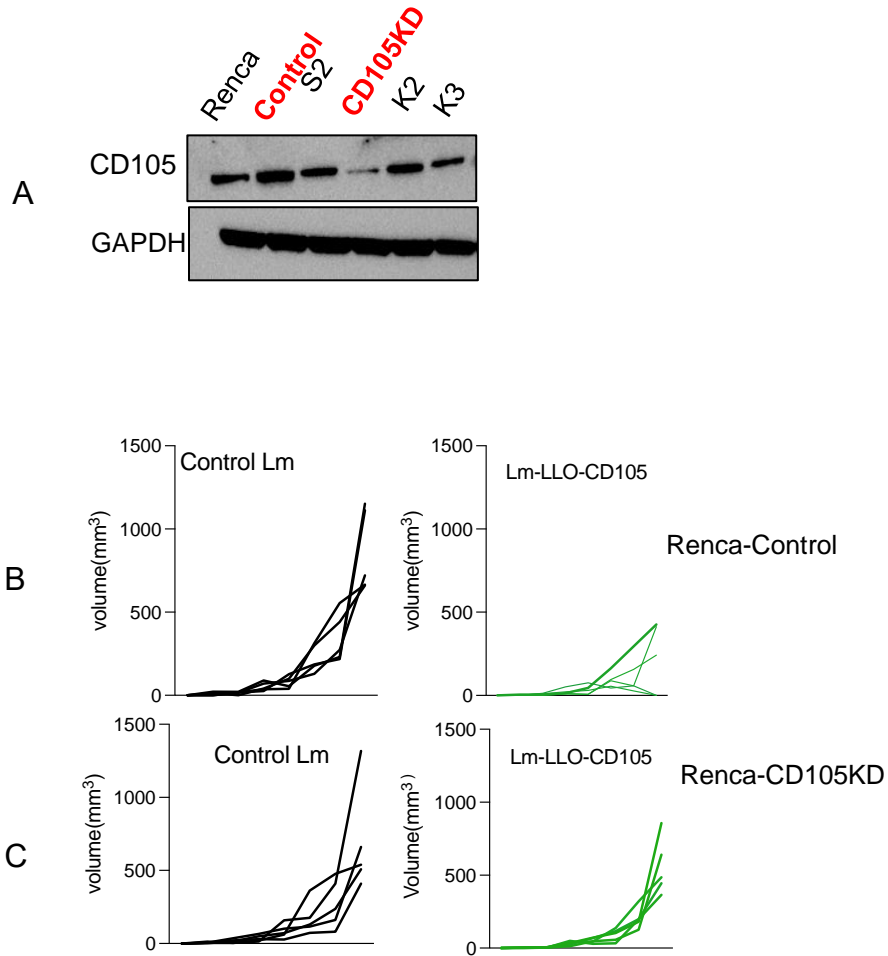

**Supplementary Figure S7. Ablation of CD105 abrogates Lm-LLO-CD105A's therapeutic efficacy** (A) Western blot confirmation of CD105 depletion in Renca cells. (B-C) Individual tumor growth curve of (B) Renca-Control and (C) Renca-CD105KD after vaccination with Lm-LLO-CD105A or Control Lm (n=5/group).
